# Supplementary material
Source: PubMed Central journal article supplement (PMC4666685)
Supplement: NIHMS423758-supplement-01.pdf [file NIHMS423758-supplement-01.pdf]

# Supporting Information and Appendices

## 414 Appendix A: Sensitivity of the stochastic growth rate

The stochastic growth rate of the perturbed population,  $\bar{a}(s)$ , can be calculated from the products of the perturbed matrices  $X_j$ , where at time  $t$ :  $X_j(t) = X^*(t) + sH_j(t)$ . Given  $M$  independent sample paths of  $T$  time steps each, for any sample path  $j$ :

$$\Lambda_j(T) = V_{j,T}^T X_j(T) X_j(T-1) \dots X_j(1) U_j(0)$$

$$a_j = \lim_{T \rightarrow \infty} \frac{\log \Lambda_j(T)}{T}$$

Now if we expand in the above product in orders of  $s$ ,  $O(s)$ , we have:

$$\Lambda_j(s) = \Lambda_j(0) + s V_j^T(T) \left( \sum_{i=1}^T X_j(T) \dots H(i) X_j(i-1) \dots X_j(1) \right) U_j(0) + O(s^2)$$

Therefore,

$$\bar{a}(s) = \frac{1}{M} \sum_{j=1}^M \lim_{T \rightarrow \infty} \frac{1}{T} \log \left( \Lambda_j(0) + s V_j^T(T) \left( \sum_{i=1}^T X_j(T) \dots H_j(i) X_j(i-1) \dots X_j(1) \right) U(0) + O(s^2) \right)$$

Retaining only terms  $O(s)$ :

$$\bar{a}(s) = \log(\Lambda_o + \delta\Lambda) \simeq \log \Lambda_o + \frac{\delta\Lambda}{\Lambda_o}$$

This leads to, for any sample path:

$$\begin{aligned} \log \Lambda(s) &= \log \Lambda_o + s \lim_{T \rightarrow \infty} \frac{1}{T} \left( \frac{(V^T(T) \sum_{i=1}^T X(T) X(T-1) \dots H(i) X(i-1) \dots X(1) U(0))}{V^T(T) X(T) X(T-1) \dots X(i) X(i-1) \dots X(1) U(0)} \right) \\ &= \log \Lambda_o + \lim_{T \rightarrow \infty} \frac{1}{T} \sum_{i=1}^T \left( \frac{(V(i)^T H(i) U_{i-1})}{V(i)^T X(i) U_{i-1}} \right) \\ &= \log \Lambda_o + \lim_{T \rightarrow \infty} \frac{1}{T} \sum_{i=1}^T \left( \frac{(V(i)^T H(i) U_{i-1})}{\lambda(i) V(i)^T U(i)} \right) \\ &= \log \Lambda_o + E \left[ \frac{V(t)^T H(t) U(t-1)}{\lambda(t) V(t)^T U(t)} \right] \end{aligned}$$

For sample path  $j$ , at time  $t$ , define:

$$\xi_{j,t} = \frac{V_j(t)^T H_j(t) U_j(t-1)}{\lambda_j(t) V_j(t)^T U_j(t)}$$

The mean of these for that sample path is:

$$\bar{\xi}_j = \lim_{T \rightarrow \infty} \frac{1}{T} \sum_{t=1}^T \frac{V_j(t)^T H_j(t) U_j(t-1)}{\lambda_j(t) V_j(t)^T U_j(t)}$$

and the mean of these quantities across all runs is:

$$S_a = \bar{\xi} = \frac{1}{M} \sum_{i=1}^M \bar{\xi}_i$$

## Appendix B: Sensitivity of the variance in long run population growth

We take the variance of the stochastic growth of our reference population to be:

$$v \simeq \frac{1}{MT} \sum_{j=1}^M (\log \Lambda_j(T) - T\bar{a})^2 \quad (12)$$

After a small perturbation,  $s$ , the value of  $v(s)$  will be changed by some small value  $\delta v$  where  $v(s) = v(0) + s\delta v + O(s^2)$ . We wish to estimate the change  $\delta v$ . For simplicity, hereafter take  $\log \Lambda_j$  to indicate  $\log \Lambda_j(T)$ , and retain only terms of  $O(s)$ .

After perturbation, the new values of  $\log \Lambda_j$  will be:

$$\begin{aligned} \log \Lambda_j(s) &= \log \Lambda_j(0) + sT\bar{\xi}_j \\ \bar{a}(s) &= \bar{a}(0) + s\bar{\xi} \\ &= \bar{a}(0) + \frac{s}{M} \sum_{j=1}^M \bar{\xi}_j \end{aligned}$$

and

$$\Lambda_j = \sum_{t=1}^T \lambda_j(t)$$

$$\bar{\xi}_j = \frac{1}{T} \sum_{t=1}^T \xi_j(t)$$

Then we can approximate the variance of the perturbed population as:

$$\begin{aligned} v(s) &= \frac{1}{MT} \sum_j (\log \Lambda_j(T)(s) - T\bar{a}(s))^2 \\ &= \frac{1}{MT} \sum_{j=1}^M \left( \left( \sum_{t=1}^T (\log \lambda_j(t) + s \sum_{i=t}^T \xi_j(t)) \right) - T(\bar{a}(0) + s\bar{\xi}) \right)^2 \\ &= \frac{1}{MT} \sum_{j=1}^M (\log \Lambda_j(0) + Ts\bar{\xi}_j - T(\bar{a}(0) + Ts\bar{\xi}))^2 \\ &= \frac{T}{MT} \sum_{j=1}^M ((a_j(0) - \bar{a}(0)) + s(\bar{\xi}_j - \bar{\xi}))^2 \\ &= \frac{1}{M} \sum_{j=1}^M (a_j(0) - \bar{a}(0))^2 + 2(a_j(0) - \bar{a}(0))s(\bar{\xi}_j - \bar{\xi}) + O(s^2) \\ &= v(0) + \frac{2s}{M} \sum_{j=1}^M (a_j(0) - \bar{a}(0))(\bar{\xi}_j - \bar{\xi}) + O(s^2) \end{aligned}$$

and thus, the rate of change in the variance due to the perturbation is:

$$S_v = \frac{2s}{M} \sum_{j=1}^M (a_j - \bar{a})(\bar{\xi}_j - \bar{\xi}) \quad (13)$$

## 420 Appendix C. Probability of quasiextinction and its sensitivity

We define a population to be quasi-extinct if it falls to 1 percent of its current size. Call this quasi-extinction threshold  $\theta$ . Then the probability of quasi-extinction will be (after

Caswell 2001):

$$P_q = \begin{cases} 1 & \text{if } a < 0 \\ e^{(\frac{2a \log \theta}{v})} & \text{if } a > 0 \end{cases}$$

By taking the log and applying the chain rule to the above, we get the sensitivity of the log extinction probability when  $a > 0$  :

$$\begin{aligned} \log P_q &= 2 \log \theta + \frac{a}{v} \\ S_{\log P_q} &= \frac{S_a}{v} - \frac{a}{v^2} S_v \end{aligned}$$

Since we are interested in  $S_{P_q}$  we write:

$$\frac{S_{P_q}}{P_q} = S_{\log P_q} = \frac{S_a}{v} - \frac{a}{v^2} S_v$$

and rearrange to get:

$$S_{P_q} = P_q \left( \frac{S_a}{v} - \frac{a}{v^2} S_v \right)$$

When dealing with elasticities of  $a$  and  $v$  instead of sensitivities, (recalling that  $S_a = aE_a$ ), this becomes:

$$\begin{aligned} S_{P_q} &= P_q \left( \frac{aE_a}{v} - \frac{aE_v}{v} \right) \\ &= \frac{a}{v} P_q (E_a - E_v) \end{aligned}$$

## 422 Appendix D. Cumulative Extinction Risk

The probability that a population will ever reach a given extinction threshold, (say,  $\theta = N_e/N_o$ ) is  $P_q = e^{(\frac{2a \log \theta}{v})}$  when  $a > 0$ . In practice, when  $a$  is often less than 0 and

extinction is certain, it is more useful to know the probability that a population will reach the threshold before some time horizon,  $t$ . If we condition on the quasiextinction threshold eventually being reached, time to extinction ( $T_q$ ) is a positive real-valued random variable with a continuous probability distribution that can be written in terms of a standard normal cdf (Lande and Orzack 1988, Dennis et al 1991):

$$P(T_q \leq t) = G(t; \theta, a, v) = \Phi\left(\frac{\log \theta - at}{\sqrt{vt}}\right) + e^{(\frac{2 \log \theta a}{v})} \Phi\left(\frac{\log \theta + at}{\sqrt{vt}}\right) \quad (14)$$

where  $\Phi$  is the standard normal probability integral:

$$\Phi(x) = \frac{1}{\sqrt{2\pi}} \int_{-\infty}^x e^{-z^2/2} dz$$

Now we define  $P_q(t)$  to be the probability of quasiextinction,  $P_q$ , before some time horizon,  $t$ . For any given  $t$ , this probability of quasiextinction,  $P_q(t)$ , is the cumulative probability defined above as  $P(T_q \leq t)$  (Lande and Orzack 1988, Dennis et al 1991, Morris and Doak 2002).

The sensitivities of this time-horizon-specific  $P_q$  are its derivatives with respect to some perturbation, call it  $\alpha$ .

For now, let's also define  $x = \frac{\log \theta - at}{\sqrt{vt}}$ ,  $y = \frac{2 \log \theta a}{v}$  and  $z = \frac{\log \theta + at}{\sqrt{vt}}$  such that  $P(T_q \leq t) = \Phi(x) + e^y \Phi(z)$

Now we take the derivative to find that:

$$\frac{dP_q(t)}{d\alpha} = \frac{d\Phi(x)}{dx} \frac{dx}{d\alpha} + \frac{dy}{d\alpha} e^y \Phi(z) + e^y \frac{d\Phi(z)}{dz} \frac{dz}{d\alpha} \quad (15)$$

Since the normal pdf is the derivative of the cdf, we can simplify:

$$\frac{dP_q(t)}{d\alpha} = \phi(x) \frac{dx}{d\alpha} + \frac{dy}{d\alpha} e^y \Phi(z) + \phi(z) \frac{dz}{d\alpha} \quad (16)$$

Now we find expressions for  $dx/d\alpha$ ,  $dy/d\alpha$  and  $dz/d\alpha$ :

$$\begin{aligned} x &= \frac{\log \theta - at}{\sqrt{vt}} \\ \frac{dx}{d\alpha} &= \frac{-t \frac{da}{d\alpha} (\sqrt{vt}) - \sqrt{t} \frac{d\sqrt{v}}{d\alpha} (\log \theta - at)}{vt} \\ &= -\frac{1}{\sqrt{vt}} \left( t \frac{da}{d\alpha} + \frac{(\log \theta - at) dv}{2v} \right) \end{aligned}$$

$$\begin{aligned}
y &= \frac{2 \log \theta a}{v} \\
\frac{dy}{d\alpha} &= \left( (2 \log \theta \frac{da}{d\alpha})v - (2 \log \theta a)(\frac{dv}{d\alpha}) \right) (v^{-2}) \\
&= \frac{2 \log \theta}{v^2} \left( v \frac{da}{d\alpha} - a \frac{dv}{d\alpha} \right) \\
z &= \frac{\log \theta + at}{\sqrt{vt}} \\
\frac{dz}{d\alpha} &= \frac{t \frac{da}{d\alpha} (\sqrt{vt}) - \sqrt{t} \frac{d\sqrt{v}}{d\alpha} (\log \theta + at)}{vt} \\
&= \frac{t \sqrt{vt} \frac{da}{d\alpha} - \sqrt{t} (\log \theta + at) \frac{1}{2\sqrt{v}} \frac{dv}{d\alpha}}{vt} \\
&= \sqrt{\frac{t}{v}} \frac{da}{d\alpha} - \left( \frac{\log \theta + at}{2v\sqrt{vt}} \right) \frac{dv}{d\alpha} \\
&= \frac{1}{\sqrt{vt}} \left( t \frac{da}{d\alpha} - \frac{(\log \theta + at)}{2v} \frac{dv}{d\alpha} \right)
\end{aligned}$$

Subbing back in our expressions for  $x$ ,  $y$ ,  $z$  and their derivatives, we get a general expression for the sensitivity of  $P_q(t)$  to a perturbation  $\alpha$ :

$$\begin{aligned}
\frac{dP_q(t)}{d\alpha} &= \phi\left(\frac{\log \theta - at}{\sqrt{vt}}\right) \frac{-1}{\sqrt{vt}} \left( t \frac{da}{d\alpha} + \frac{(\log \theta - at)}{2v} \frac{dv}{d\alpha} \right) \\
&\quad + e^{\frac{2 \log \theta a}{v}} \left( \frac{2 \log \theta}{v^2} \left( v \frac{da}{d\alpha} - a \frac{dv}{d\alpha} \right) \Phi\left(\frac{\log \theta + at}{\sqrt{vt}}\right) \right) + \frac{1}{\sqrt{vt}} \left( t \frac{da}{d\alpha} - \frac{(\log \theta + at)}{2v} \frac{dv}{d\alpha} \right) \phi\left(\frac{\log \theta + at}{\sqrt{vt}}\right)
\end{aligned}$$

Note that terms  $\frac{da}{d\alpha}$  and  $\frac{dv}{d\alpha}$  are the sensitivities of  $a$  and  $v$  ( $S_a$  and  $S_v$ ) to the same perturbation. A change of notation clarifies our final expression for the sensitivity of cumulative extinction probability:

$$\begin{aligned}
S_{P_q}(t) &= \frac{-1}{\sqrt{vt}} \phi\left(\frac{\log \theta - at}{\sqrt{vt}}\right) (tS_a + \frac{(\log \theta - at)}{2v} S_v) \\
&\quad + e^{\frac{2 \log \theta a}{v}} \left( \frac{2 \log \theta}{v^2} (vS_a - aS_v) \Phi\left(\frac{\log \theta + at}{\sqrt{vt}}\right) \right) + \frac{1}{\sqrt{vt}} \left( tS_a - \frac{(\log \theta + at)}{2v} S_v \right) \phi\left(\frac{\log \theta + at}{\sqrt{vt}}\right)
\end{aligned} \tag{17}$$

## Appendix E. Supplementary Figures.

---

---

**Figure E:** Upper quantile of stationary stage distributions

---

---

**Figure F:** Probability of and expected time to quasiextinction as a function of  $q$

---

---

**Figure G:** Stochastic growth rate and its variance as a function of  $q$
